# Supplementary material
Source: PubMed Central journal article supplement (PMC8994772)
Supplement: 41598_2022_10057_MOESM1_ESM.pdf [file 41598_2022_10057_MOESM1_ESM.pdf]

**Table S1.** The B cell epitope candidates in the SARS-CoV-2 spike protein using BepiPred-2.0 algorithm

| Peptide n° | Amino acid sequence                                         | Position  | Length |
|------------|-------------------------------------------------------------|-----------|--------|
| 1          | SQCVNLTTRTQLPPAYTNSFTRGVY                                   | 13-37     | 25     |
| 2          | FSNVTWFHAIHVSGTNGTKRFDN                                     | 59-81     | 23     |
| 3          | DPFLGVYYHKNNKSWME                                           | 138-154   | 17     |
| 4          | MDLEGKQGNFKNL                                               | 177-189   | 13     |
| 5          | KHTPINLVRDLPQGFS                                            | 206-221   | 16     |
| 6          | TPGDSSSGWTA                                                 | 250-260   | 11     |
| 7          | KSFTVEKGIYQTSNFRVQP                                         | 304-322   | 19     |
| 8          | FPNITNLCPFGEVFNATRFASVYAWNKRKISNCVA                         | 329-363   | 35     |
| 9          | YNSASFSTFKCYGVSPTKLNDLCFT                                   | 369-393   | 25     |
| 10         | GDEVROIAPGQTGKIADYNYKLP                                     | 404-426   | 23     |
| 11         | NLDSKVGNYLYRLEFRKSNLKPFRDISTEIYQAGSTPCNGVEGFNCYFPLQSYGFQPTN | 440-501   | 62     |
| 12         | ELLHAPATVCGPKKSTNLVKN                                       | 516-536   | 21     |
| 13         | NCTEVPVAIHADQLTPT                                           | 616-632   | 17     |
| 14         | RVYSTGSNVFQ                                                 | 634-644   | 11     |
| 15         | VNNSYECDIPI                                                 | 656-666   | 11     |
| 16         | ASYQTQTNSPPARRSVASQ                                         | 672-690   | 19     |
| 17         | YTMSLGAENSVAYSNN                                            | 695-710   | 16     |
| 18         | KQIYKTPPIKDFGGF                                             | 786-800   | 15     |
| 19         | PDPSKPSK                                                    | 807-814   | 8      |
| 20         | LADAGFIKQYGDCLG                                             | 828-842   | 15     |
| 21         | RNFYEPQIITTD                                                | 1107-1118 | 12     |
| 22         | VNNTVYDPLQPELDSFKEELDKYFKNHTSPDVLGDISGI                     | 1133-1172 | 40     |
| 23         | SCCKFDEDDSEPVKLG                                            | 1252-1267 | 16     |

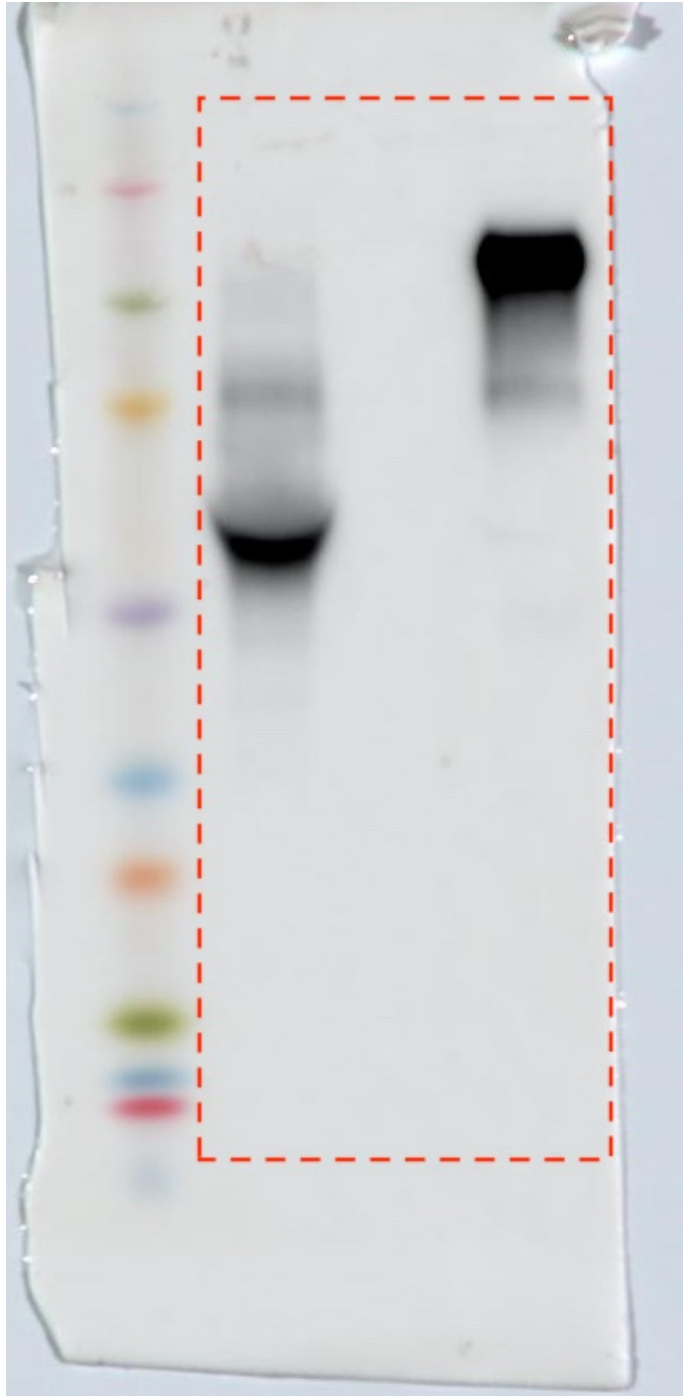

Figure S1. **Original and unprocessed immunoblot used in the Figure 2A.** The hatched red line depicts the portion of immunoblot gel shown in Fig. 2A.

**Table S2.** COVID-19 immune subject characteristics

| donor n° | age <sup>1</sup> | gender | origin | date of specimen collection | IgM <sup>2</sup> | IgG <sup>2</sup> |
|----------|------------------|--------|--------|-----------------------------|------------------|------------------|
| 1        | 13               | F      | France | 11.20                       | +++              | ++               |
| 2        | 18               | F      | France | 12.20                       | +                | +++              |
| 3        | 23               | M      | France | 11.20                       | ++++             | +++              |
| 4        | 23               | M      | France | 11.20                       | ++++             | ++               |
| 5        | 38               | F      | France | 11.20                       | ++++             | +++              |
| 6        | 42               | F      | France | 11.20                       | ++++             | +                |
| 7        | 45               | F      | France | 12.20                       | ++++             | ++               |
| 8        | 45               | F      | France | 11.20                       | +                | +++              |
| 9        | 46               | F      | France | 11.20                       | +                | +++              |
| 10       | 51               | F      | France | 11.20                       | ++               | ++               |
| 11       | 51               | F      | France | 12.20                       | ++               | ++               |
| 12       | 53               | F      | France | 11.20                       | ++++             | ++               |
| 13       | 59               | M      | France | 11.20                       | +                | +++              |
| 14       | 59               | F      | France | 12.20                       | +++              | +++              |
| 15       | 61               | M      | France | 11.20                       | +++              | +++              |
| 16       | 63               | F      | France | 11.20                       | ++               | ++++             |
| 17       | 64               | F      | France | 11.20                       | +++              | ++               |
| 18       | 70               | F      | France | 12.20                       | +                | ++++             |
| 19       | 71               | F      | France | 12.20                       | ++               | ++++             |
| 20       | 73               | M      | France | 11.20                       | +                | ++++             |
| 21       | 77               | F      | France | 11.20                       | +                | ++               |
| 22       | 79               | F      | France | 12.20                       | +                | ++               |
| 23       | 80               | F      | France | 12.20                       | ++               | +++              |
| 24       | 81               | F      | France | 11.20                       | +                | +++              |
| 25       | 85               | F      | France | 11.20                       | ++               | ++               |
| 26       | 85               | F      | France | 11.20                       | ++               | ++               |
| 27       | 87               | F      | France | 11.20                       | +                | +++              |
| 28       | 91               | M      | France | 11.20                       | ++               | +++              |
| 29       | 91               | F      | France | 11.20                       | ++++             | +++              |
| 30       | 97               | F      | France | 11.20                       | +                | ++               |

<sup>1</sup>years.

<sup>2</sup>anti-SARS-CoV-2 antibodies fold increase of normal range as a score: + (1.5-2.0), ++ (2.0-4.0), +++ (4.0-6.0), ++++ (> 6.0).

**Table S3.** Infection-naïve individual characteristics

| donor n° | age <sup>1</sup> | gender | origin | date of specimen collection |
|----------|------------------|--------|--------|-----------------------------|
| 1        | 17               | F      | France | 09.19                       |
| 2        | 23               | F      | France | 09.19                       |
| 3        | 27               | M      | France | 09.19                       |
| 4        | 36               | F      | France | 09.19                       |
| 5        | 41               | F      | France | 09.19                       |
| 6        | 45               | M      | France | 09.19                       |
| 7        | 54               | M      | France | 09.19                       |
| 8        | 56               | M      | France | 09.19                       |
| 9        | 64               | M      | France | 09.19                       |
| 10       | 74               | F      | France | 09.19                       |

<sup>1</sup>years.

**Table S4.** COMIRNATY vaccine recipient characteristics.

| donor n° | age <sup>1</sup> | gender | origin              | date of vaccination | date of specimen collection |
|----------|------------------|--------|---------------------|---------------------|-----------------------------|
| 1        | 32               | F      | France <sup>2</sup> | 03.21               | 03.21                       |
| 2        | 33               | M      | France              | 02.21               | 03.21                       |
| 3        | 39               | M      | France              | 01.21               | 02.21                       |
| 4        | 44               | F      | France              | 02.21               | 02.21                       |
| 5        | 50               | F      | France              | 02.21               | 03.21                       |
| 6        | 55               | M      | France              | 02.21               | 03.21                       |
| 7        | 56               | F      | France              | 02.21               | 03.21                       |
| 8        | 58               | M      | France              | 02.21               | 02.21                       |
| 9        | 62               | M      | France              | 02.21               | 03.21                       |

<sup>1</sup>. years

<sup>2</sup>. La Reunion island (France)

---

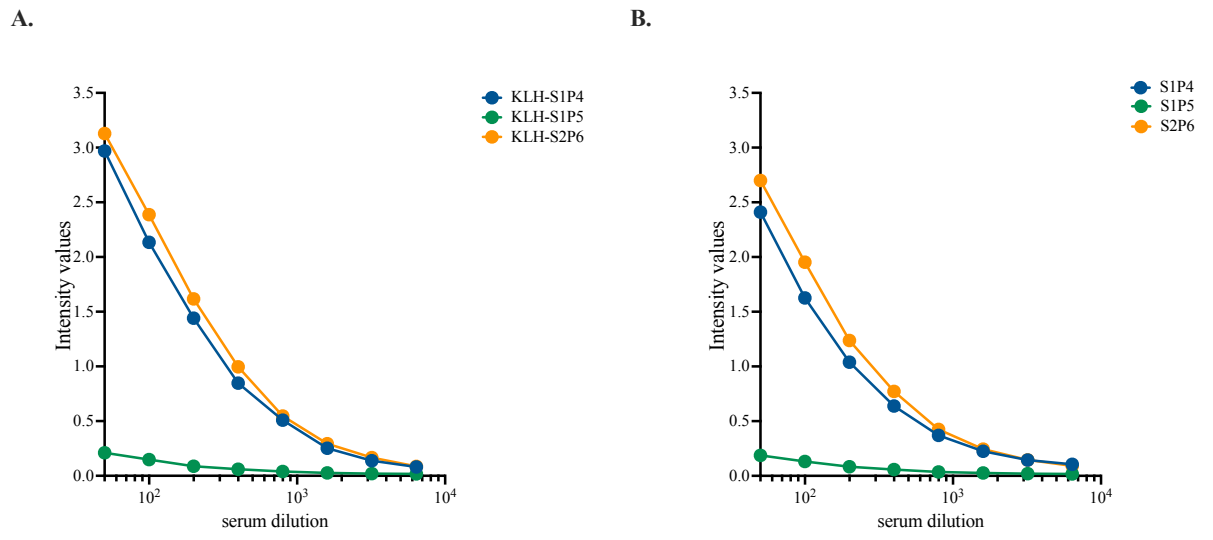

**Figure S2. Antigenic reactivity of protein-peptide conjugates.** Serum sample from a COVID-19 recovered patient who had been immunized with a single dose of COMIRNATY vaccine was collected 0.5 month after vaccine administration and serum dilutions were assayed on KLH-peptide conjugates through indirect ELISA (A) or synthetic peptides through peptide-based ELISA (B). The synthetic KLH-S1P5 conjugate and synthetic S1P5 peptide served as negative controls. The intensity values of serum samples were measured at O.D. 450 nm.

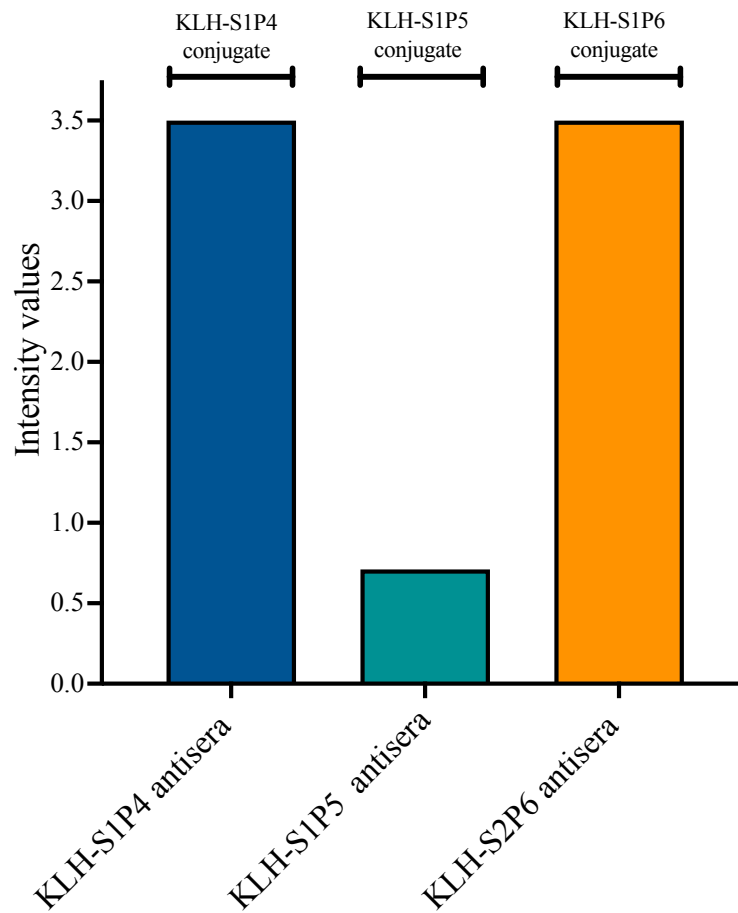

**Fig. S3. Immune reactivity of mouse antisera raised against protein-peptide conjugates.** Pools of serum samples from five mice that received KLH-peptide S1P4 (KLH-peptide S1P4 antisera), KLH-peptide S1P5 (KLH-peptide S1P5 antisera), or KLH-peptide S2P6 (KLH-peptide S2P6 antisera) in a prime-boost regimen were tested at serum dilution 1:100 for their immune reactivity in relation with protein-peptide conjugate (100 ng) by indirect ELISA. Intensity values or O.D. values at 450 nm.

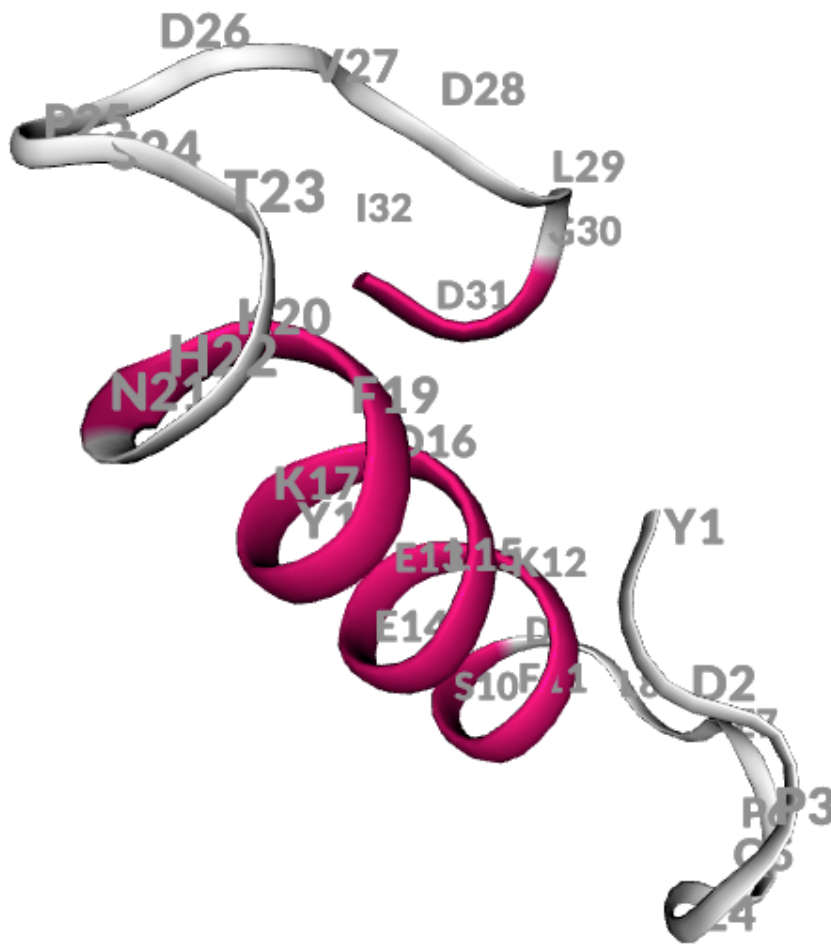

**Fig.S4. Tridimensional structure prediction of S2P6 peptide.** A 3D structure prediction of the B-cell epitope peptide S2P6 (residues Y1 to I32) was performed using PEP-FOLD3 protein recognition server (<https://mobylye.rpbs.univ-paris-diderot.fr/cgi-bin/portal.py#forms::PEP-FOLD3>) (34). The S2P6.2.0 peptide contains amino-acids S10 to D28.
